# Supplementary material for: Characterization of Composition and Structure–Property Relationships of Commercial Post-Consumer Polyethylene and Polypropylene Recyclates
Source: MDPI journal article supplement (doi:10.3390/polym13101574), 2021-05-14
Supplement: s1 [file s1]

*Supplementary Materials to*

# **Characterization of composition and structure-property relationships of commercial post-consumer polyethylene and polypropylene recyclates**

**Markus Gall <sup>1,\*</sup>, Paul J. Freudenthaler <sup>1</sup>, Joerg Fischer <sup>1</sup> and Reinhold W. Lang <sup>1</sup>**

<sup>1</sup>Institute of Polymeric Materials and Testing, Johannes Kepler University Linz, Altenberger Straße 69, 4040 Linz, Austria; ipmt@jku.at

\*Correspondence: markus.gall@jku.at; Tel.: +43-732-2468-6626

This file contains supplementary figures S1 to S20. These figures each show a false color representation of an ATR-FTIR image in (a) which was recorded from a location on the polished cross-section of a multi-purpose specimen made from the respective recycle material. Section (b) of each figure depicts the summary spectra obtained from averaging all individual ATR-FTIR spectra (one per pixel) recorded within the areas marked “1” to “6”. Relevant bands of the spectra are labeled with wavenumbers to facilitate chemical group assignment. However, a rather coarse spectral resolution of 16 cm<sup>-1</sup> was chosen for these measurements, hence wavenumbers may deviate slightly from typical literature values. Two figures are provided per recycle materials, i.e. sample 1 and sample 2 of rPE-A, etc.

(a)

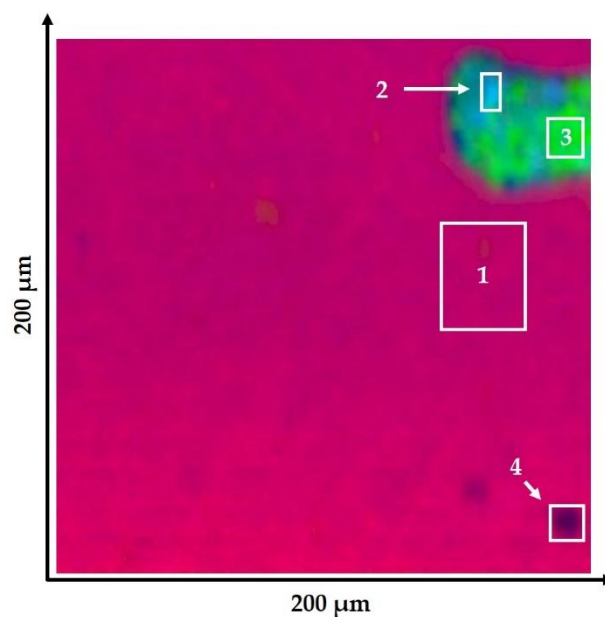

(b)

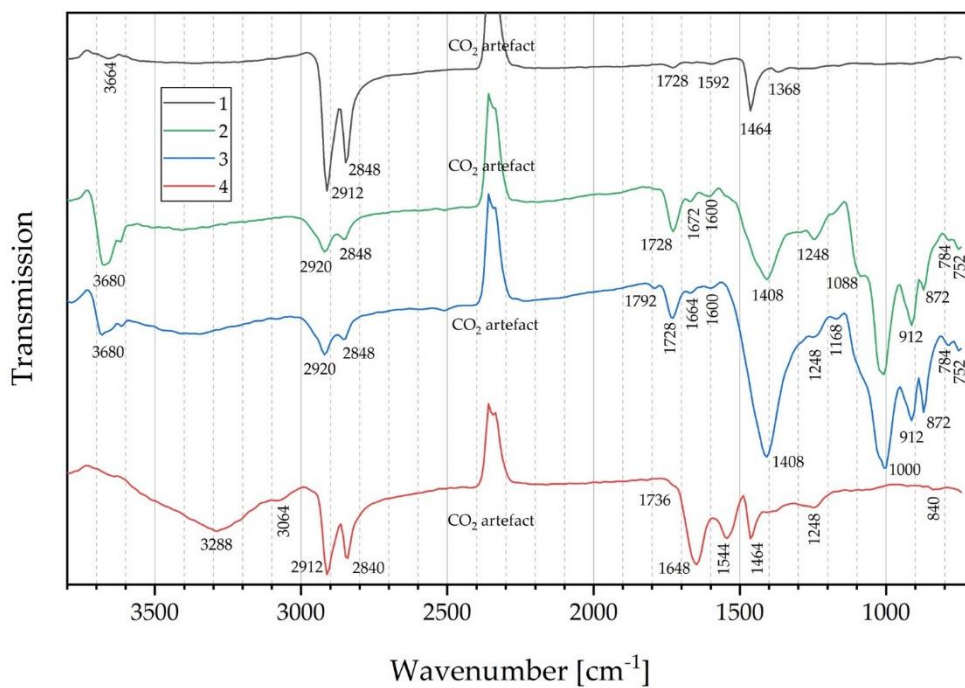

**Figure S1.** ATR-FTIR imaging of rPE-A sample 1. (a) ATR-FTIR image in false color representation recorded from a polished specimen cross-section exhibiting typical inclusions. This image is also shown in Fig. 4 (a). (b) Summary spectra obtained from the regions 1 to 4 shown in (a) including wavenumber assignments of relevant bands.

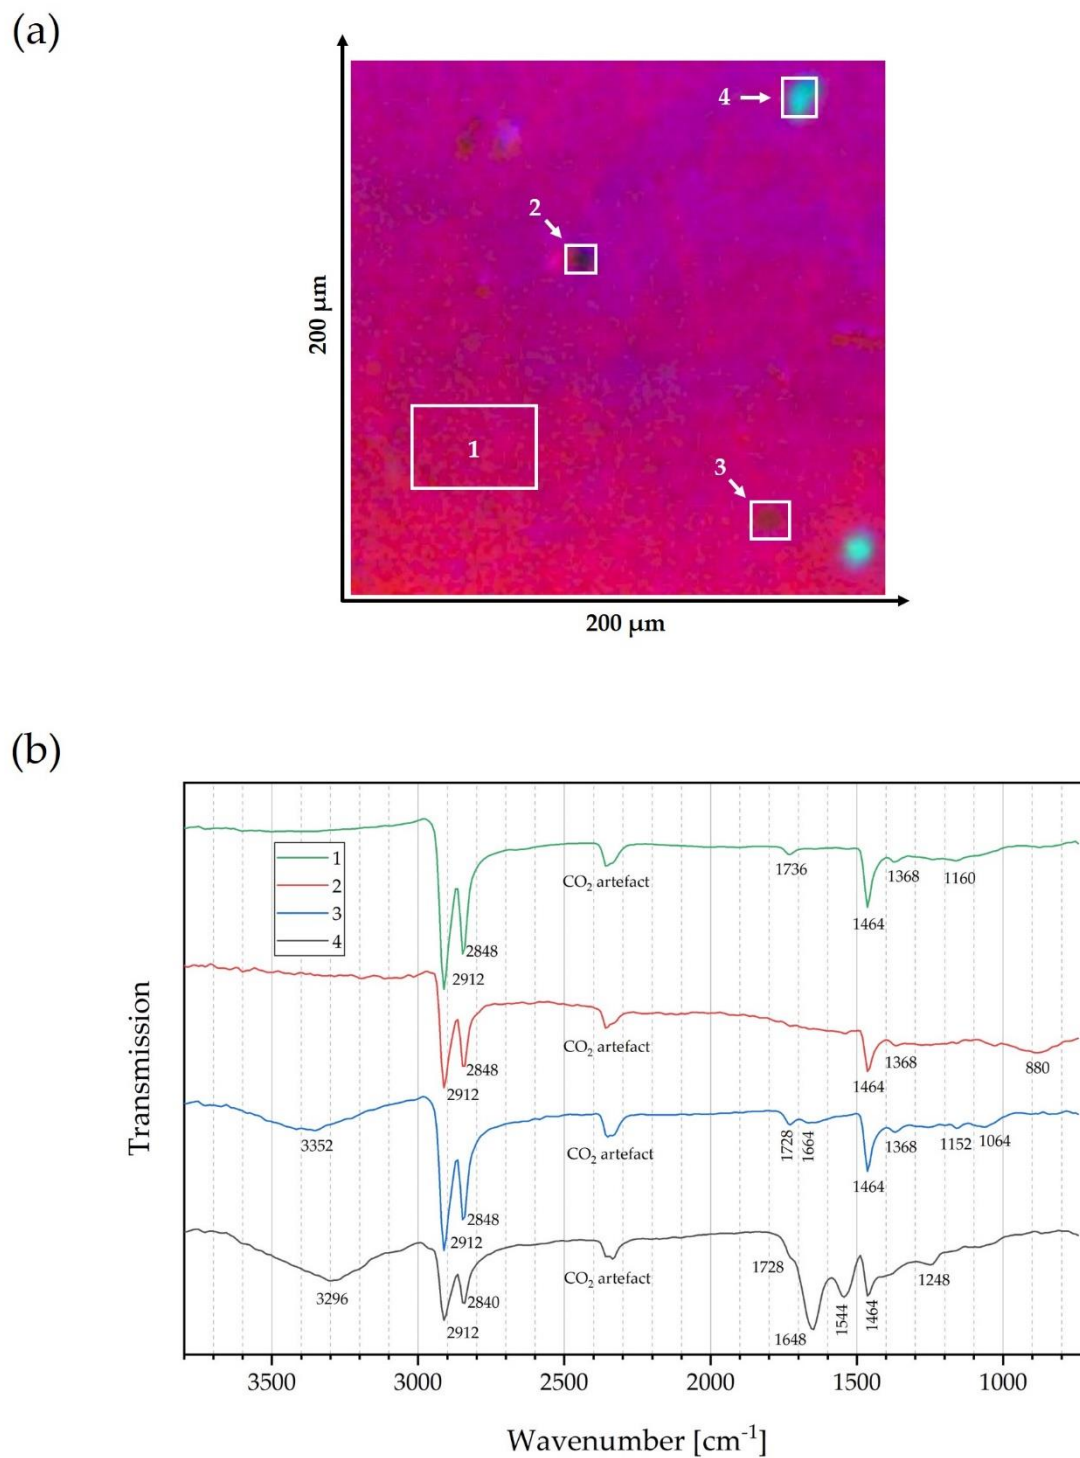

**Figure S2.** ATR-FTIR imaging of rPE-A sample 2. (a) ATR-FTIR image in false color representation recorded from a polished specimen cross-section exhibiting typical inclusions. (b) Summary spectra obtained from the regions 1 to 4 shown in (a) including wavenumber assignments of relevant bands.

(a)

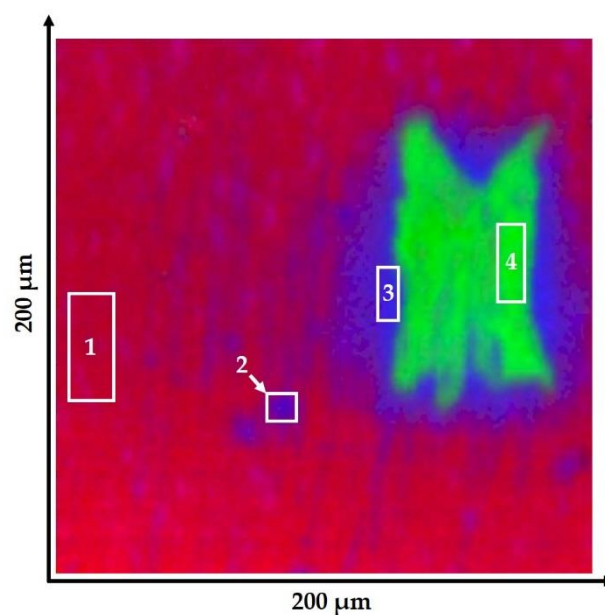

(b)

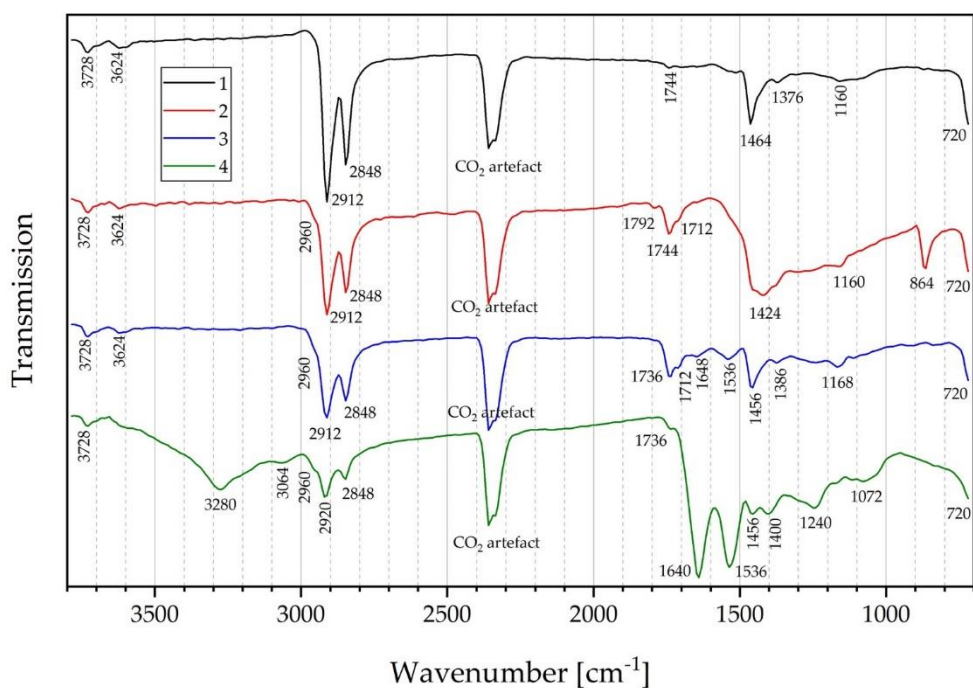

**Figure S3.** ATR-FTIR imaging of rPE-C sample 1. (a) ATR-FTIR image in false color representation recorded from a polished specimen cross-section exhibiting typical inclusions. This image is also shown in Fig. 4 (a). (b) Summary spectra obtained from the regions 1 to 4 shown in (a) including wavenumber assignments of relevant bands.

(a)

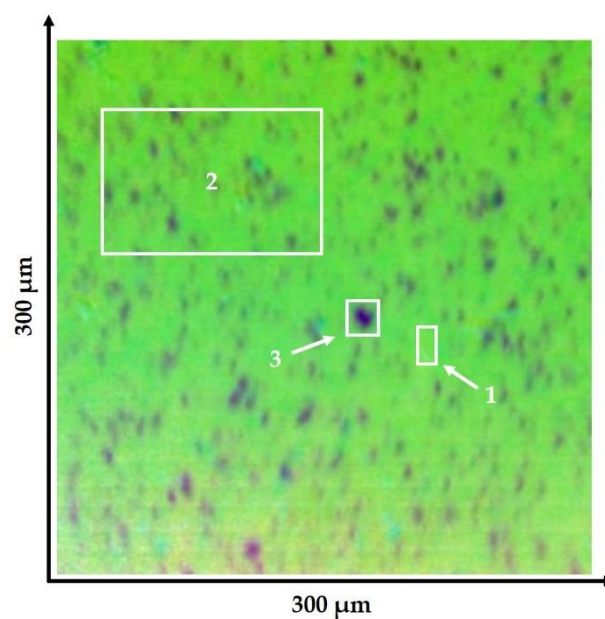

(b)

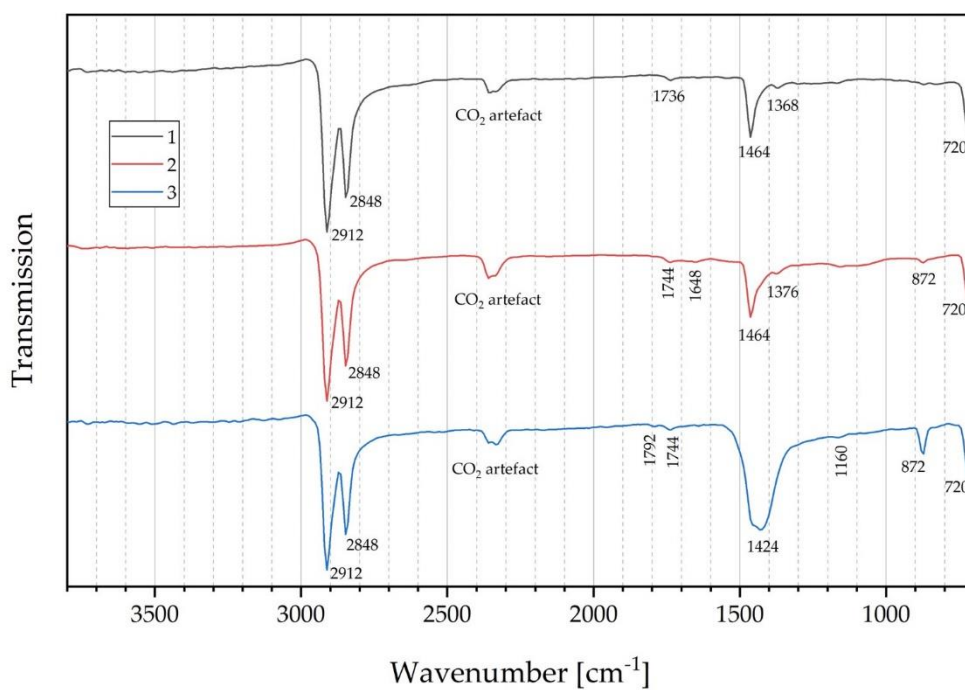

**Figure S4.** ATR-FTIR imaging of rPE-C sample 2. (a) ATR-FTIR image in false color representation recorded from a polished specimen cross-section exhibiting typical inclusions. (b) Summary spectra obtained from the regions 1 to 3 shown in (a) including wavenumber assignments of relevant bands.

(a)

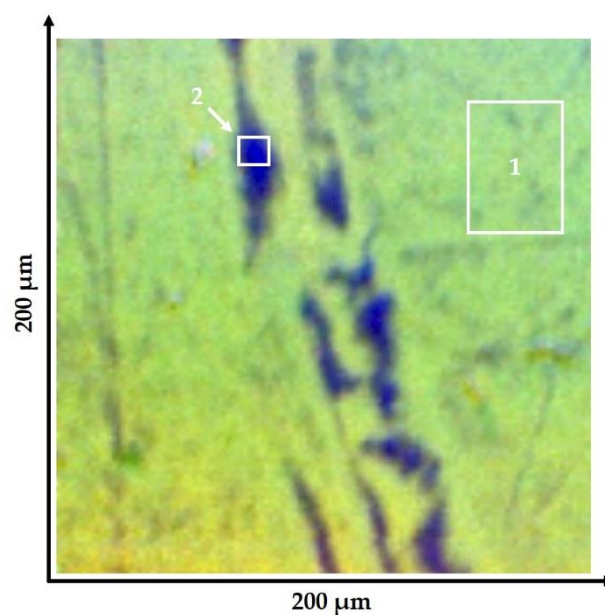

(b)

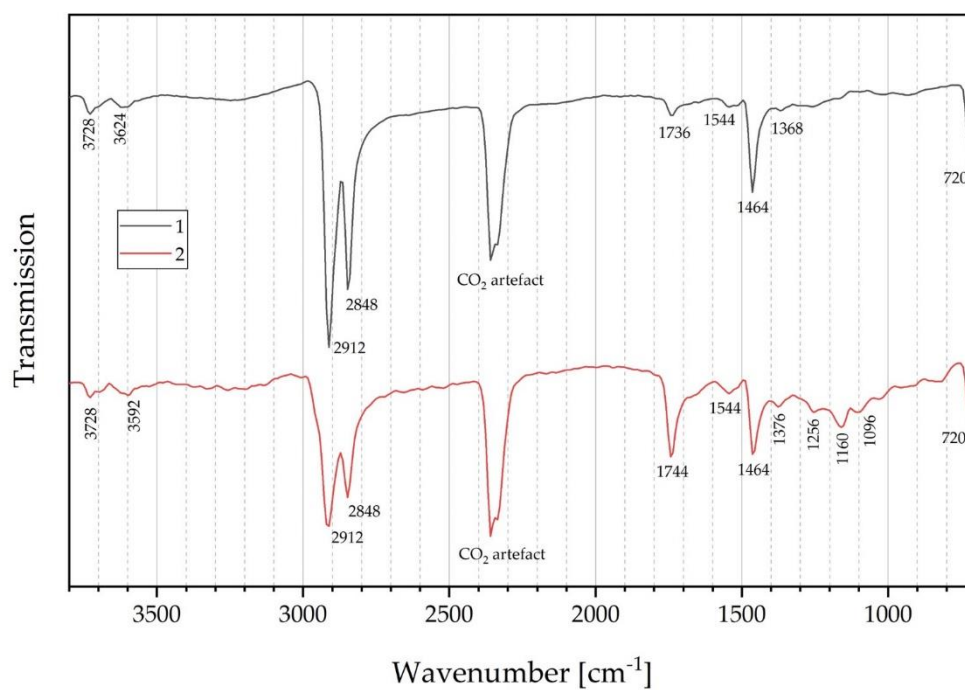

**Figure S5.** ATR-FTIR imaging of rPE-D sample 1. (a) ATR-FTIR image in false color representation recorded from a polished specimen cross-section exhibiting typical inclusions. This image is also shown in Fig. 4 (a). (b) Summary spectra obtained from the regions 1 to 2 shown in (a) including wavenumber assignments of relevant bands.



(a)

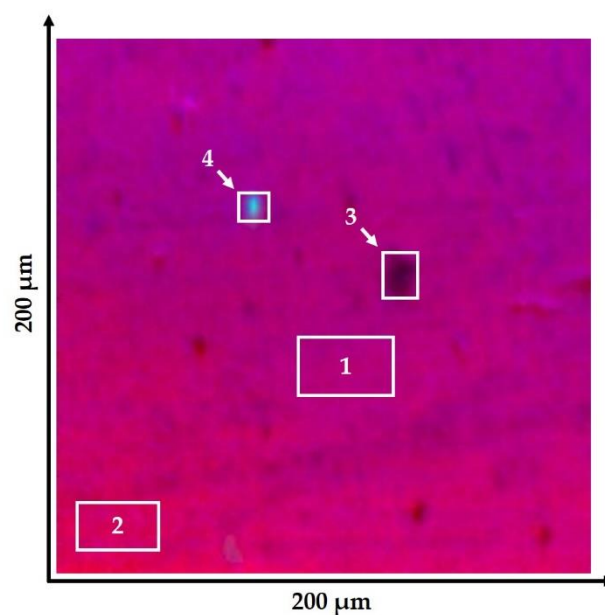

(b)

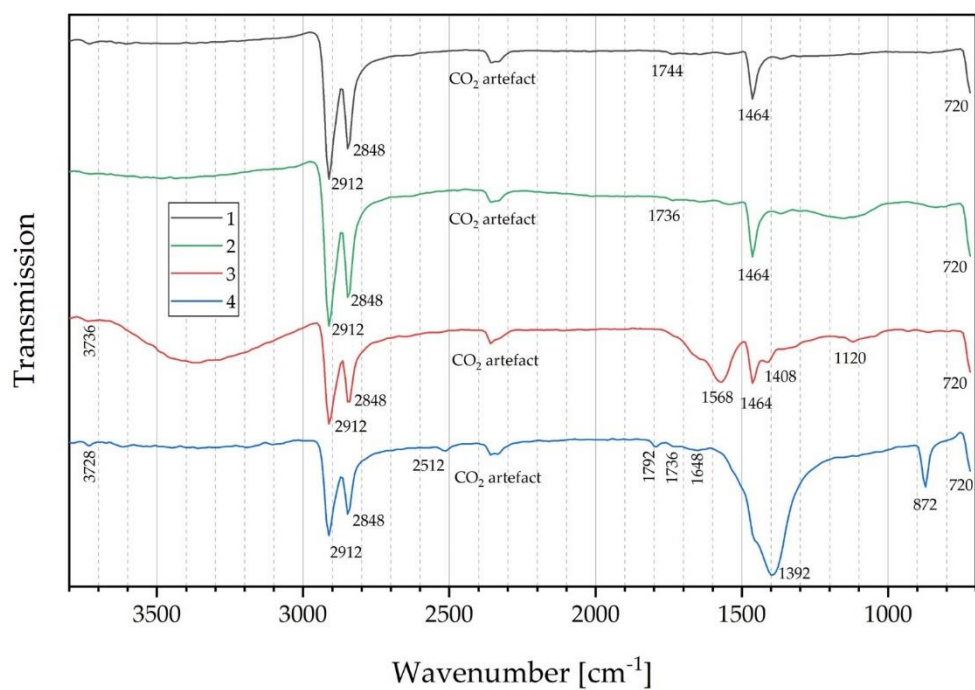

**Figure S6.** ATR-FTIR imaging of rPE-D sample 2. (a) ATR-FTIR image in false color representation recorded from a polished specimen cross-section exhibiting typical inclusions. (b) Summary spectra obtained from the regions 1 to 4 shown in (a) including wavenumber assignments of relevant bands.

(a)

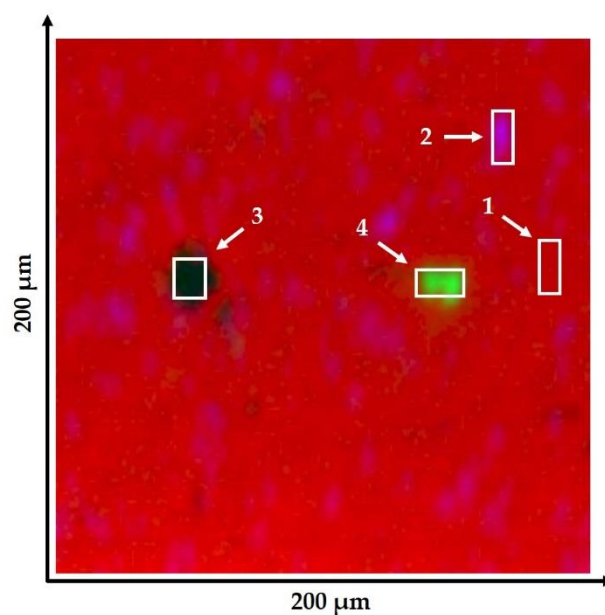

(b)

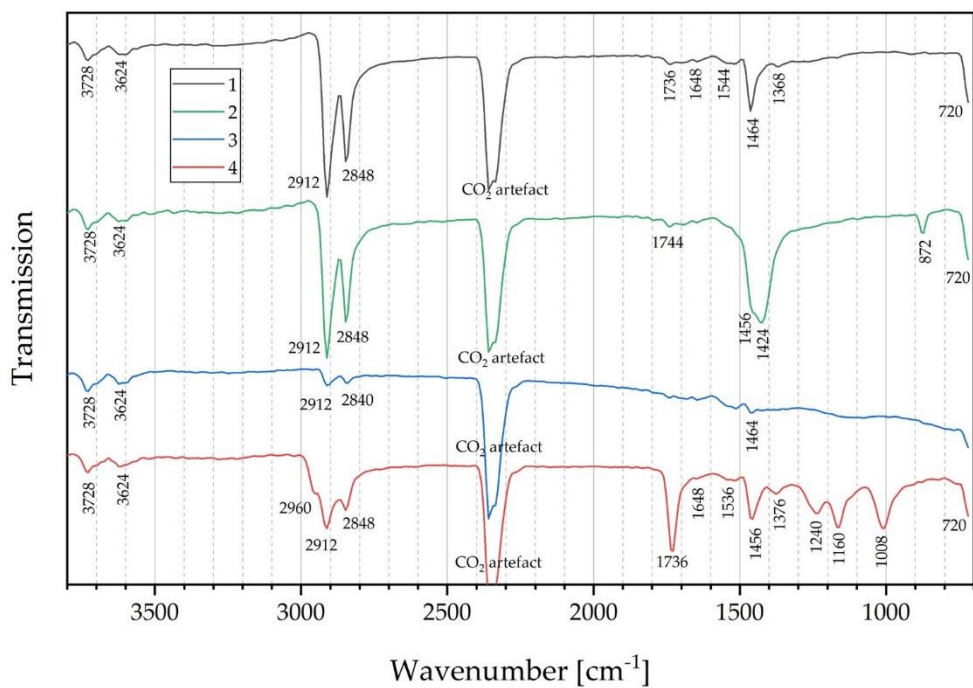

**Figure S7.** ATR-FTIR imaging of rPE-E1 sample 1. (a) ATR-FTIR image in false color representation recorded from a polished specimen cross-section exhibiting typical inclusions. This image is also shown in Fig. 4 (a). (b) Summary spectra obtained from the regions 1 to 4 shown in (a) including wavenumber assignments of relevant bands.



(a)

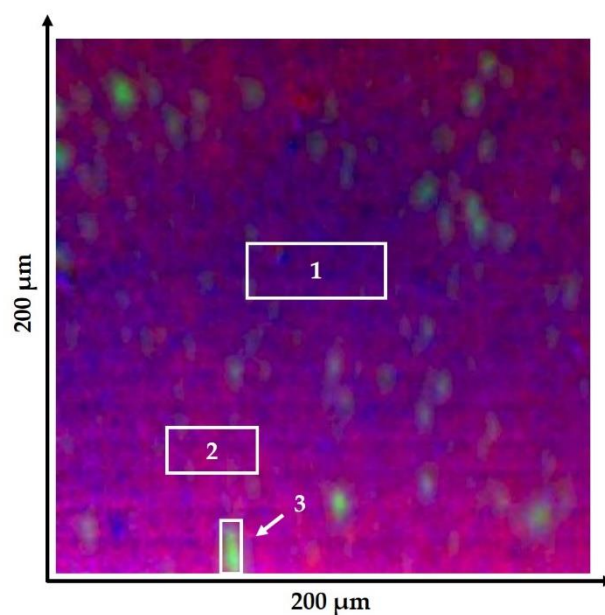

(b)

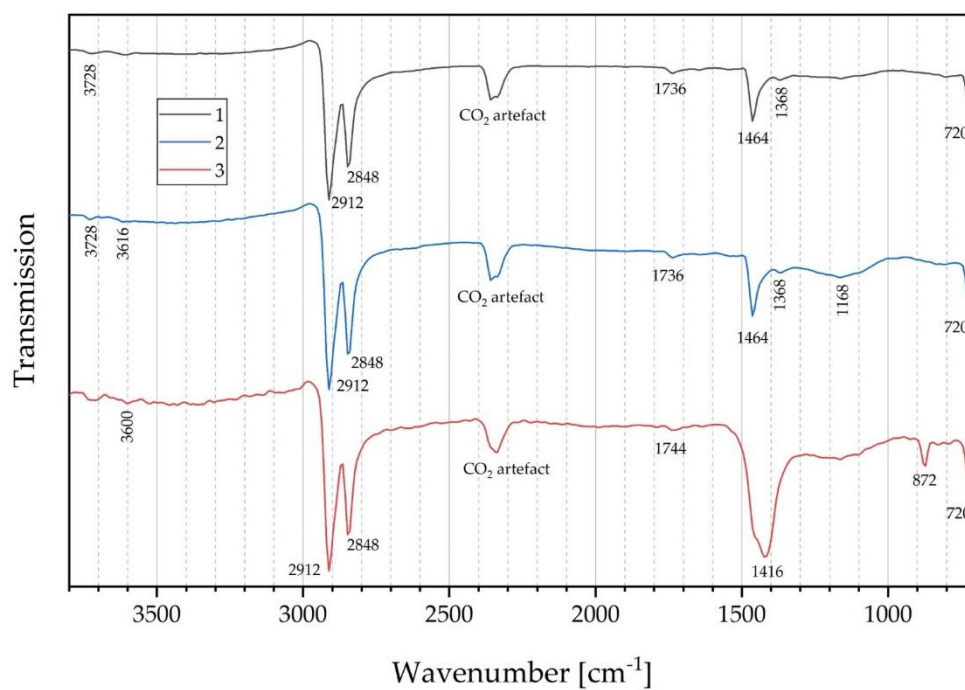

**Figure S8.** ATR-FTIR imaging of rPE-E1 sample 2. (a) ATR-FTIR image in false color representation recorded from a polished specimen cross-section exhibiting typical inclusions. (b) Summary spectra obtained from the regions 1 to 3 shown in (a) including wavenumber assignments of relevant bands.

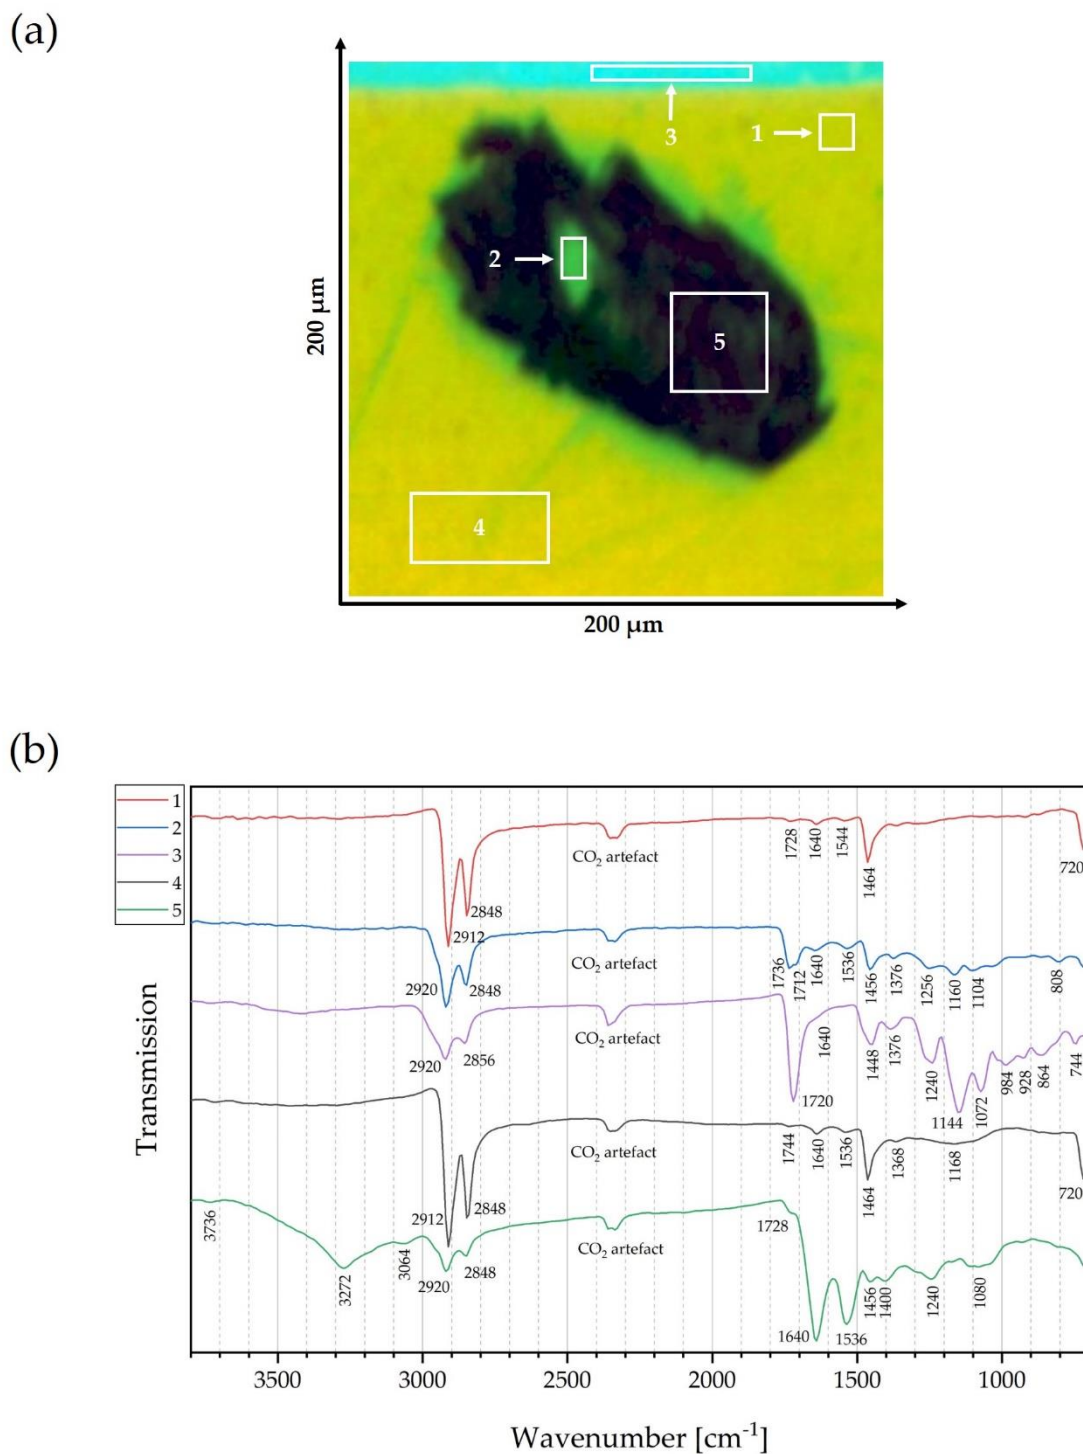

**Figure S9.** ATR-FTIR imaging of rPE-E2 sample 1. (a) ATR-FTIR image in false color representation recorded from a polished specimen cross-section exhibiting typical inclusions. This image is also shown in Fig. 4 (a). (b) Summary spectra obtained from the regions 1 to 5 shown in (a) including wavenumber assignments of relevant bands. Region 3 is the resin used for embedding the sample and is hence not part of the rPE-E2 material.

(a)

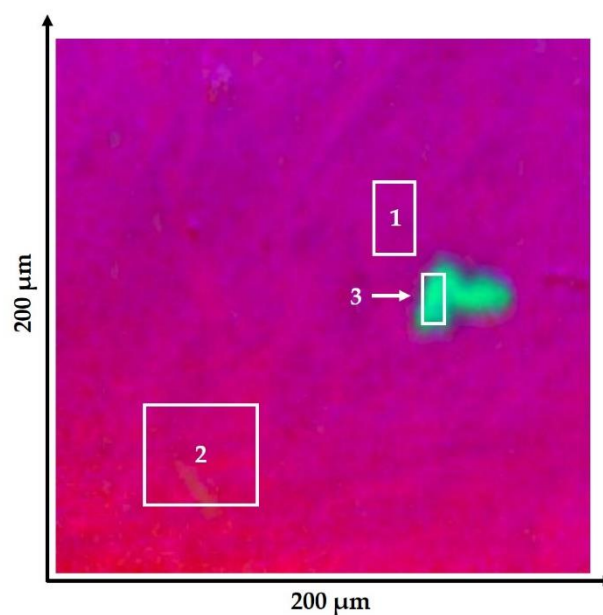

(b)

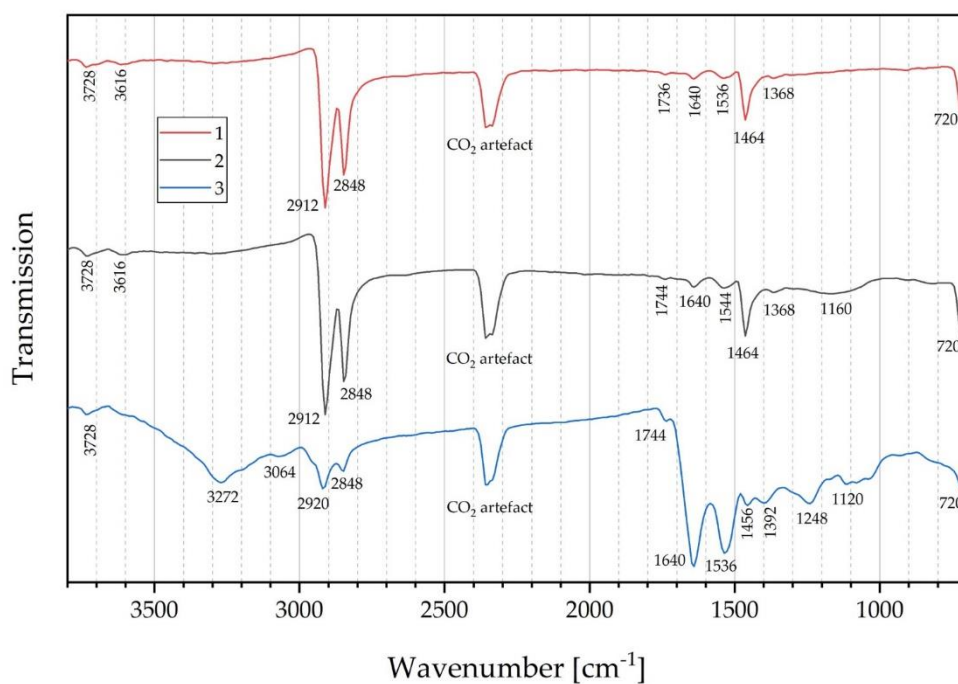

**Figure S10.** ATR-FTIR imaging of rPE-E2 sample 2. (a) ATR-FTIR image in false color representation recorded from a polished specimen cross-section exhibiting typical inclusions. (b) Summary spectra obtained from the regions 1 to 3 shown in (a) including wavenumber assignments of relevant bands.

(a)

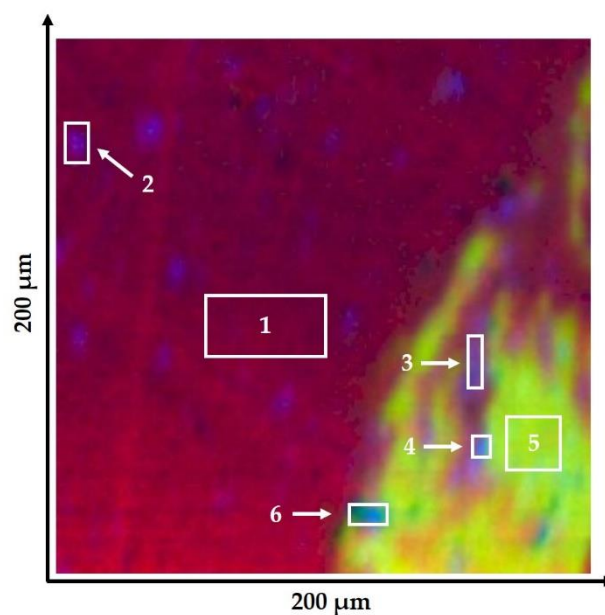

(b)

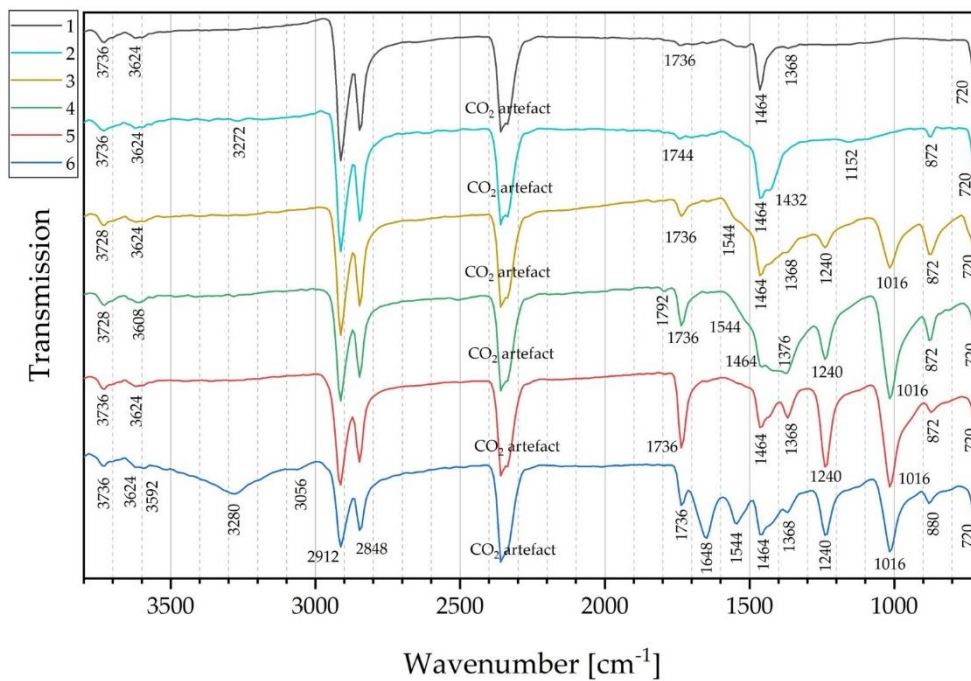

**Figure S11.** ATR-FTIR imaging of rPE-F sample 1. (a) ATR-FTIR image in false color representation recorded from a polished specimen cross-section exhibiting typical inclusions. This image is also shown in Fig. 4 (a). (b) Summary spectra obtained from the regions 1 to 6 shown in (a) including wavenumber assignments of relevant bands.

(a)

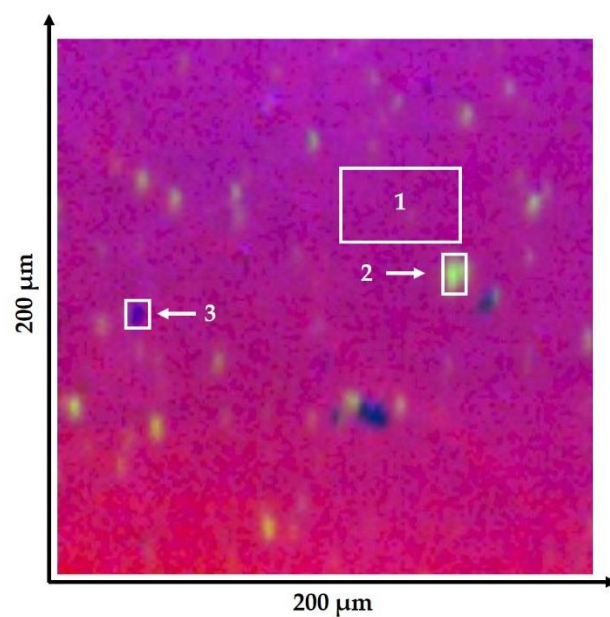

(b)

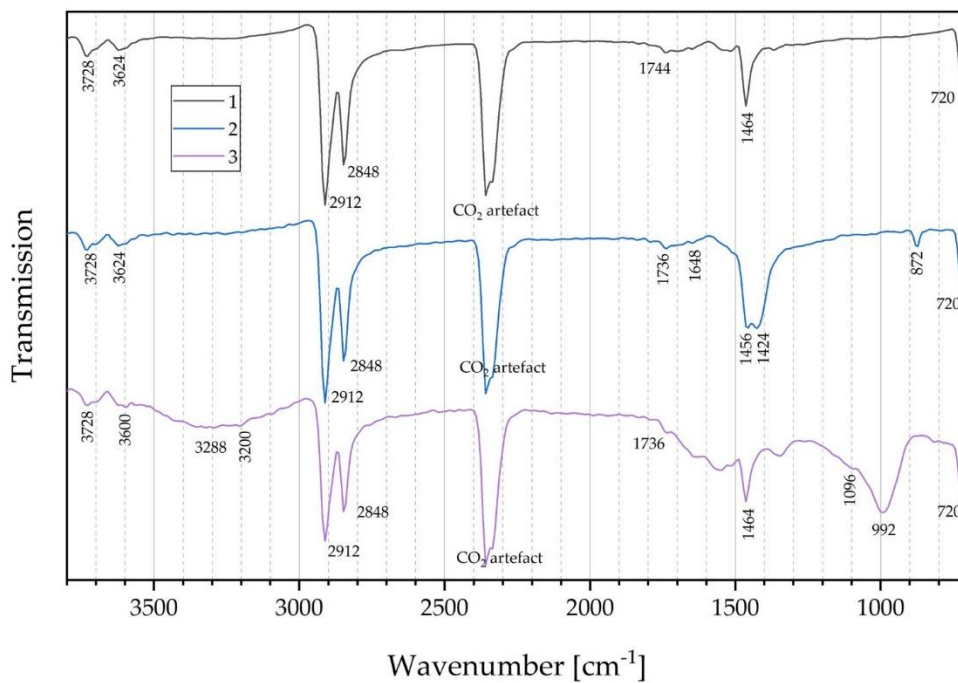

**Figure S12.** ATR-FTIR imaging of rPE-F sample 2. (a) ATR-FTIR image in false color representation recorded from a polished specimen cross-section exhibiting typical inclusions. (b) Summary spectra obtained from the regions 1 to 3 shown in (a) including wavenumber assignments of relevant bands.



(a)

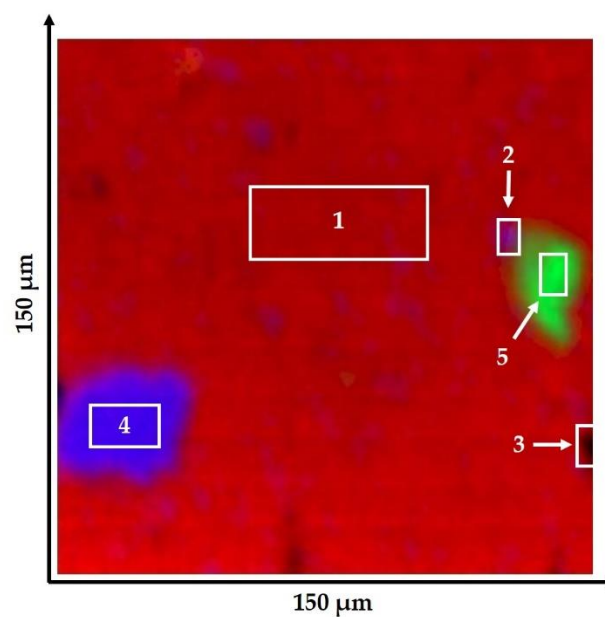

(b)

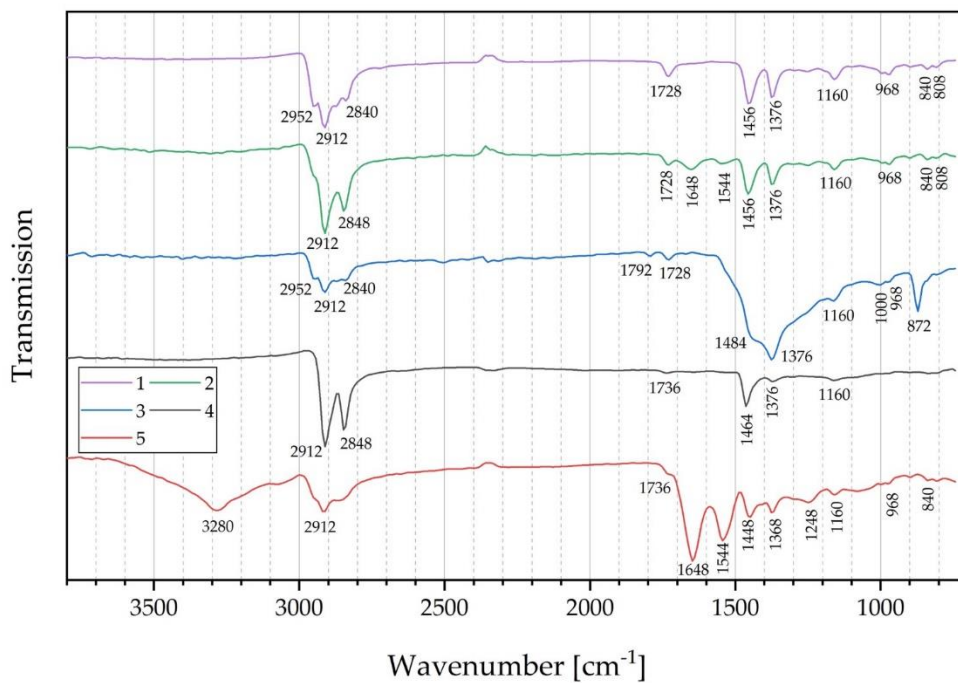

**Figure S13.** ATR-FTIR imaging of rPP-A sample 1. (a) ATR-FTIR image in false color representation recorded from a polished specimen cross-section exhibiting typical inclusions. This image is also shown in Fig. 4 (b). (b) Summary spectra obtained from the regions 1 to 5 shown in (a) including wavenumber assignments of relevant bands.



(a)

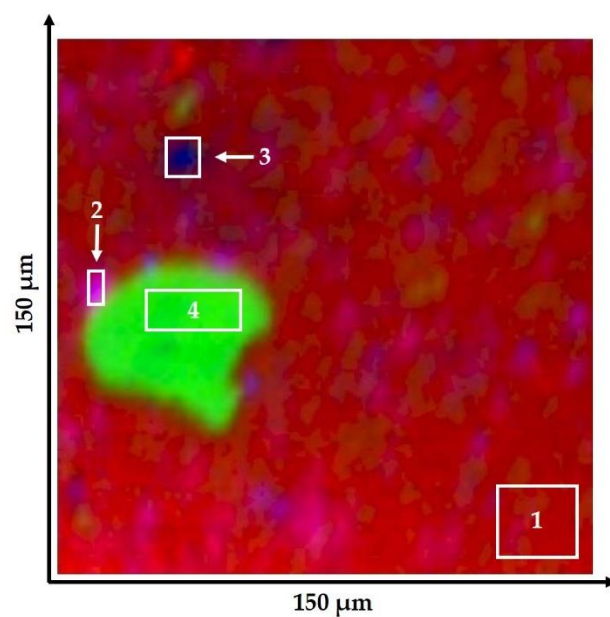

(b)

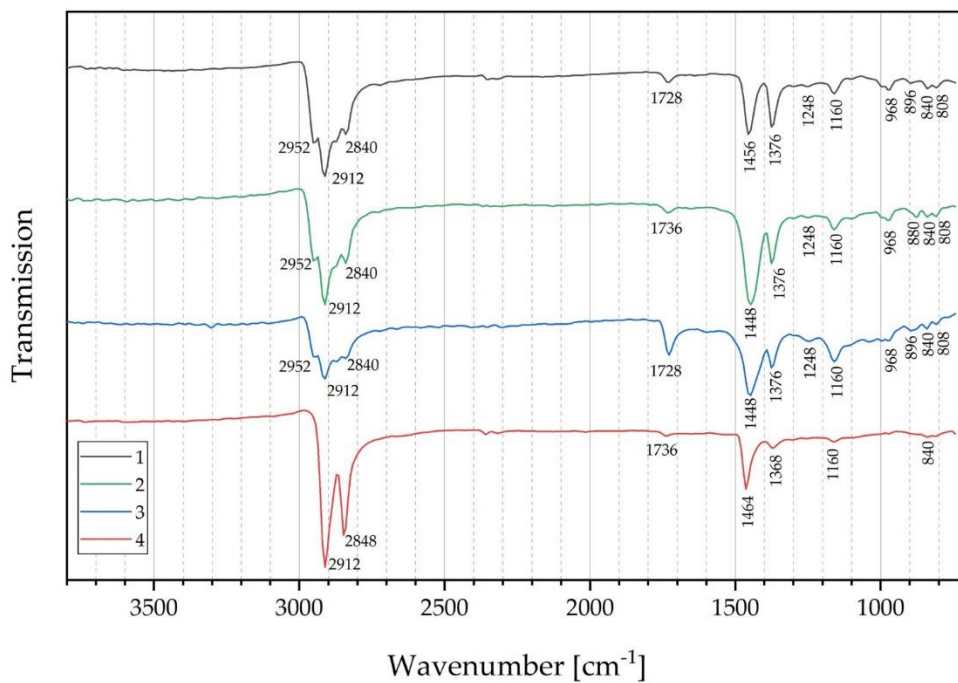

**Figure S14.** ATR-FTIR imaging of rPP-A sample 2. (a) ATR-FTIR image in false color representation recorded from a polished specimen cross-section exhibiting typical inclusions. (b) Summary spectra obtained from the regions 1 to 4 shown in (a) including wavenumber assignments of relevant bands.

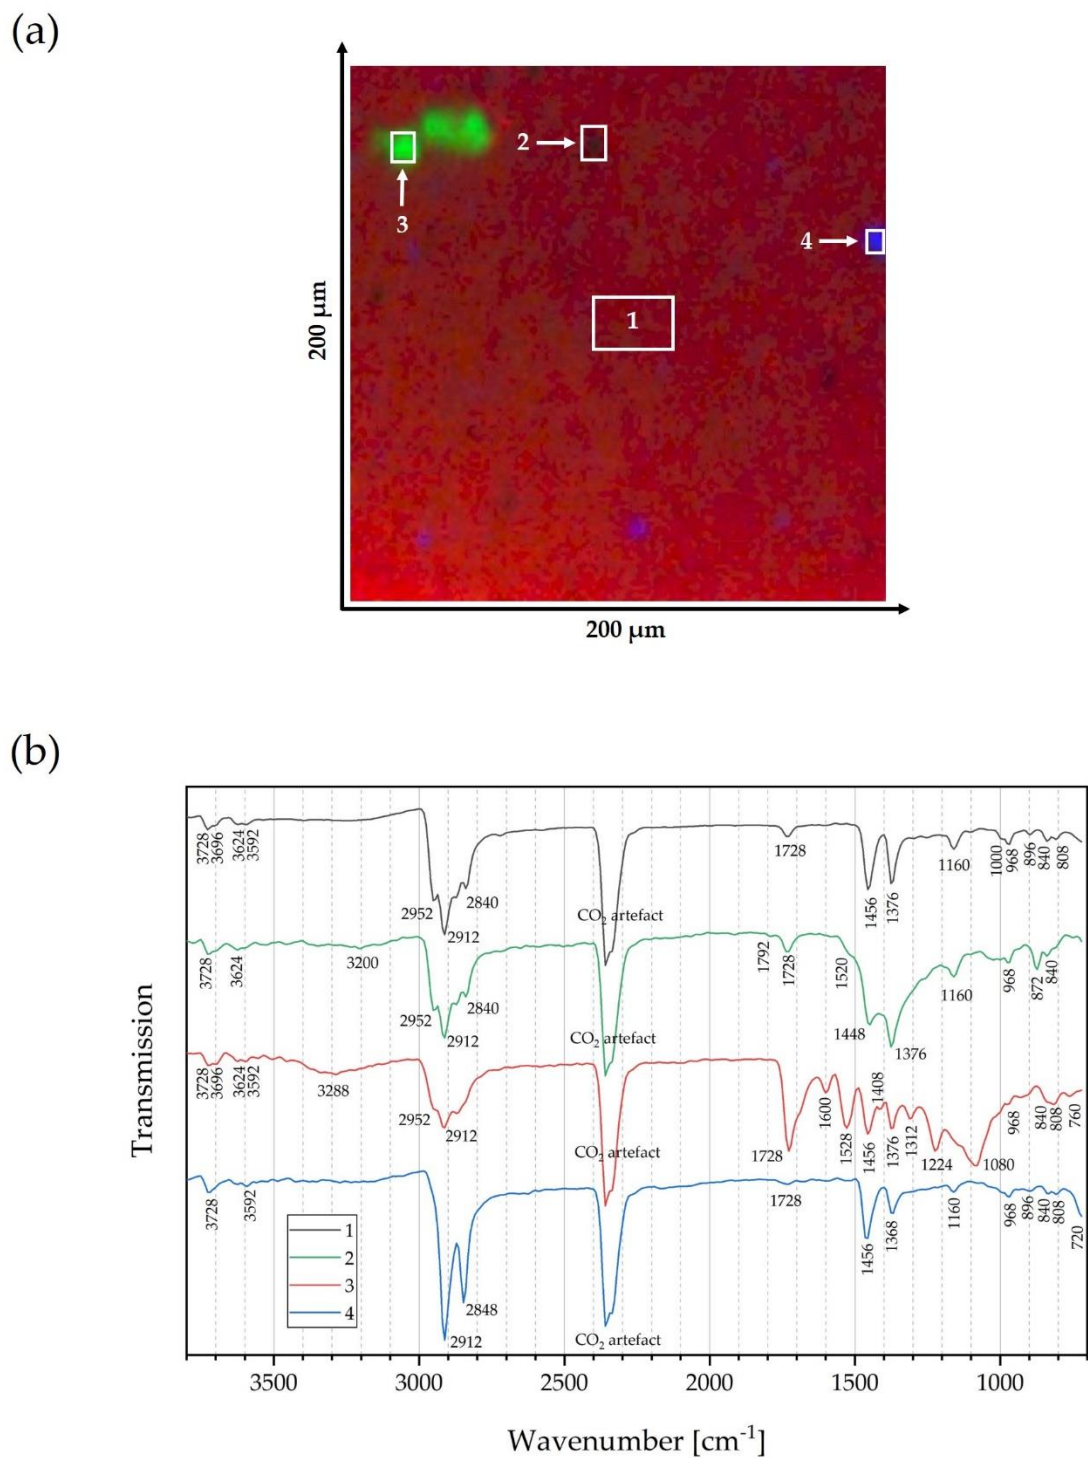

**Figure S15.** ATR-FTIR imaging of rPP-C sample 1. (a) ATR-FTIR image in false color representation recorded from a polished specimen cross-section exhibiting typical inclusions. This image is also shown in Fig. 4 (b). (b) Summary spectra obtained from the regions 1 to 4 shown in (a) including wavenumber assignments of relevant bands.

(a)

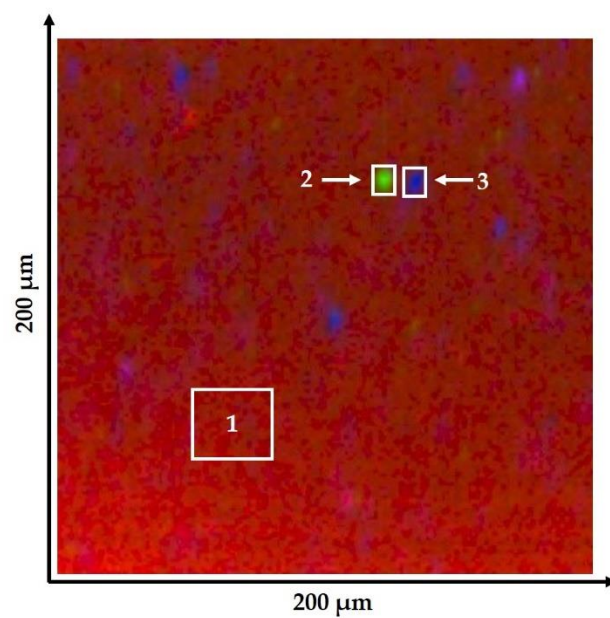

(b)

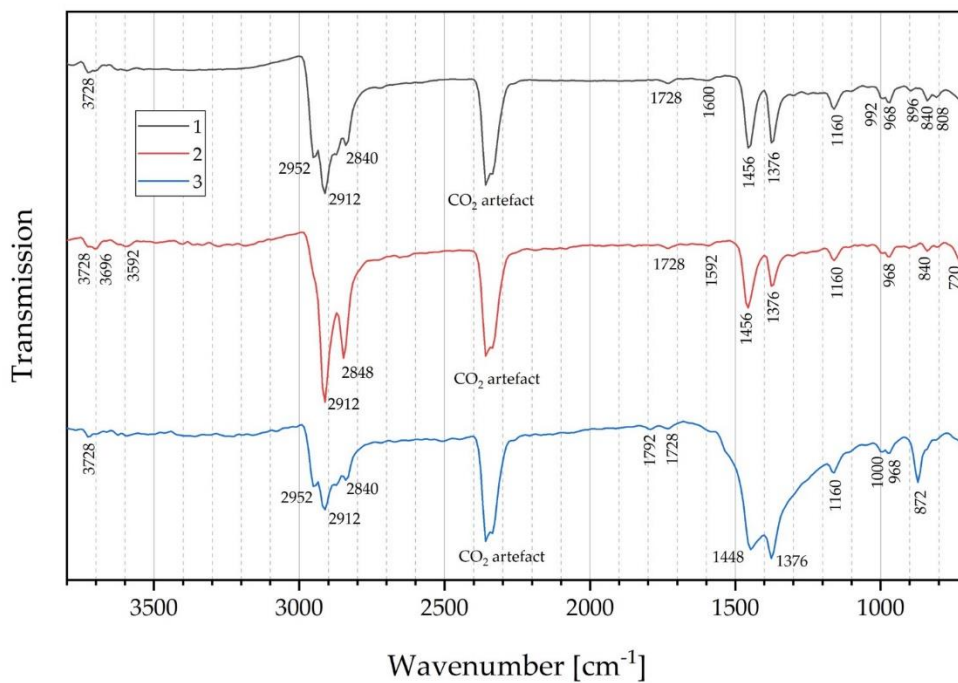

**Figure S16.** ATR-FTIR imaging of rPP-C sample 2. (a) ATR-FTIR image in false color representation recorded from a polished specimen cross-section exhibiting typical inclusions. (b) Summary spectra obtained from the regions 1 to 3 shown in (a) including wavenumber assignments of relevant bands.

(a)

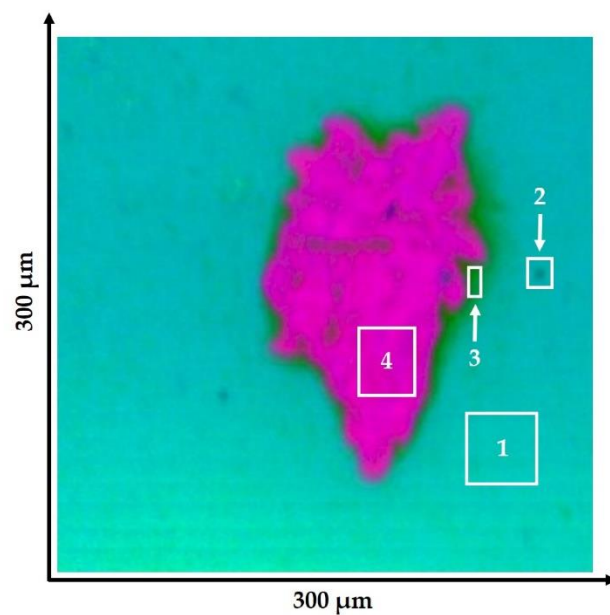

(b)

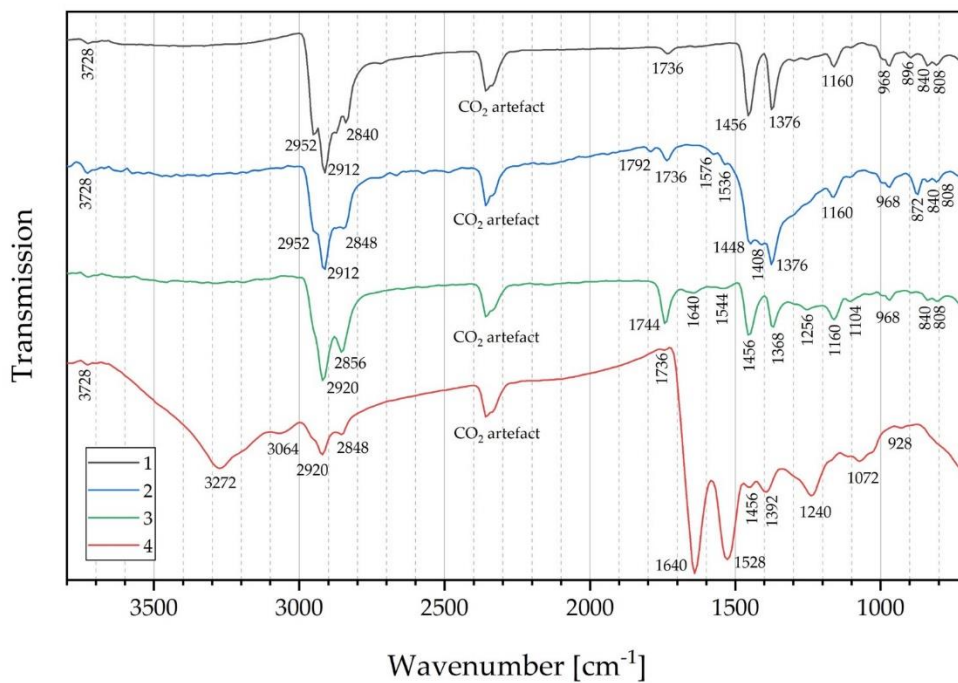

**Figure S17.** ATR-FTIR imaging of rPP-D sample 1. (a) ATR-FTIR image in false color representation recorded from a polished specimen cross-section exhibiting typical inclusions. This image is also shown in Fig. 4 (b). (b) Summary spectra obtained from the regions 1 to 4 shown in (a) including wavenumber assignments of relevant bands.

(a)

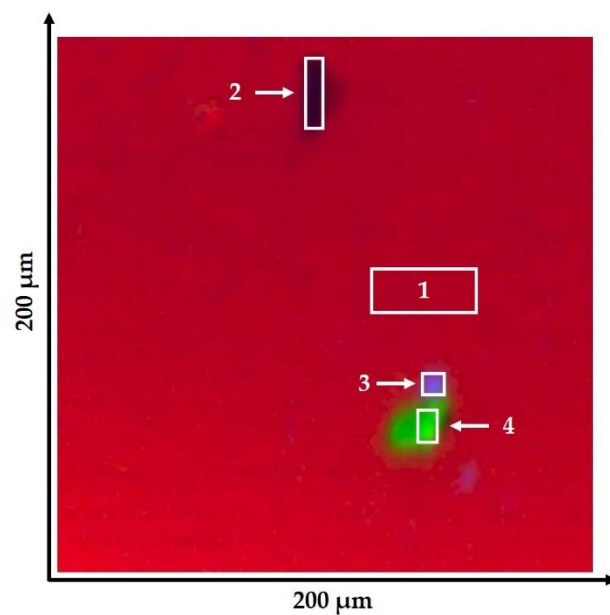

(b)

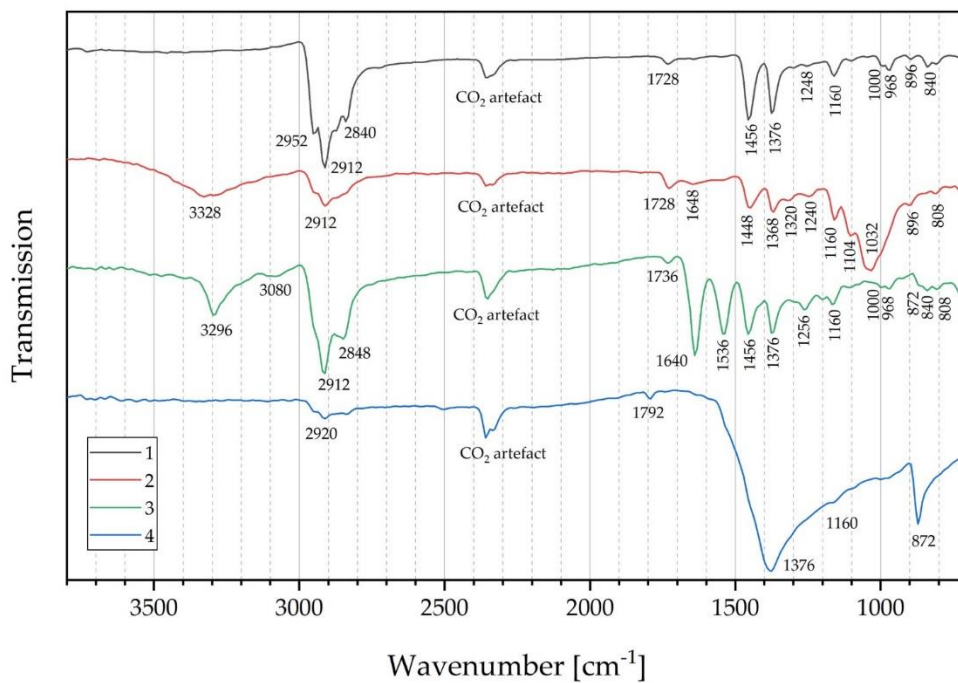

**Figure S18.** ATR-FTIR imaging of rPP-D sample 2. (a) ATR-FTIR image in false color representation recorded from a polished specimen cross-section exhibiting typical inclusions. (b) Summary spectra obtained from the regions 1 to 4 shown in (a) including wavenumber assignments of relevant bands.



(a)

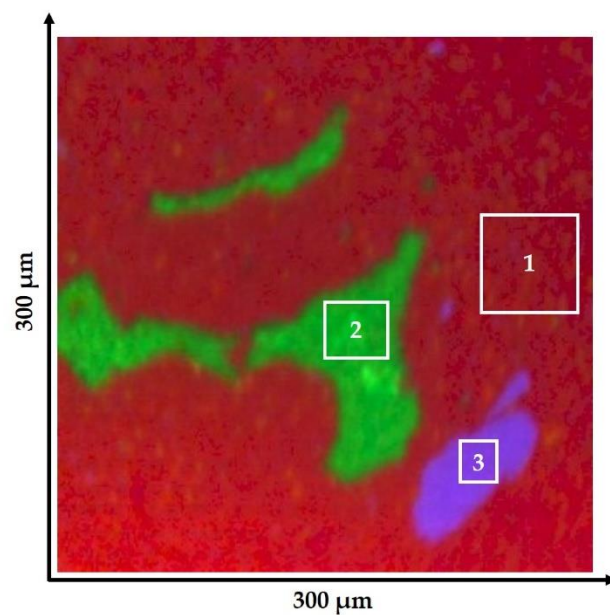

(b)

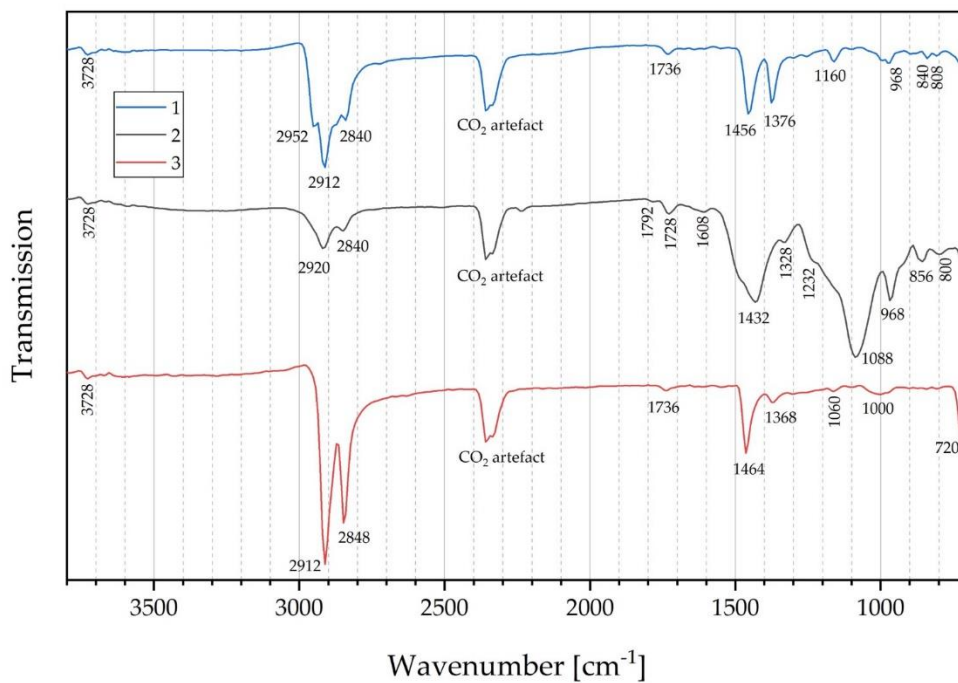

**Figure S19.** ATR-FTIR imaging of rPP-F sample 1. (a) ATR-FTIR image in false color representation recorded from a polished specimen cross-section exhibiting typical inclusions. This image is also shown in Fig. 4 (b). (b) Summary spectra obtained from the regions 1 to 3 shown in (a) including wavenumber assignments of relevant bands.



(a)

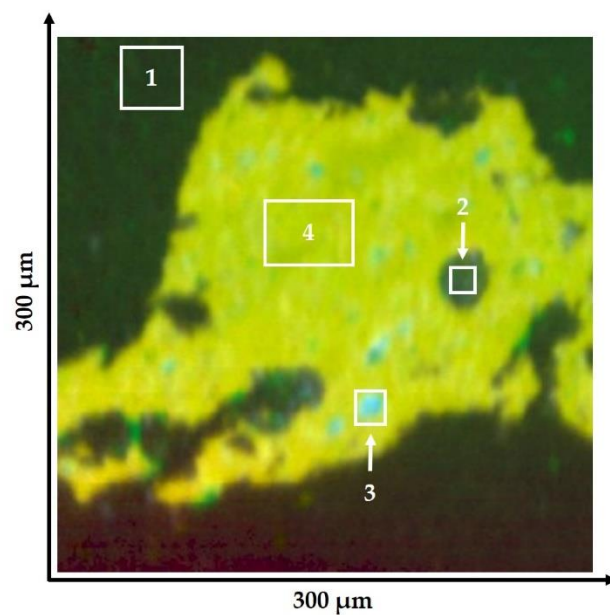

(b)

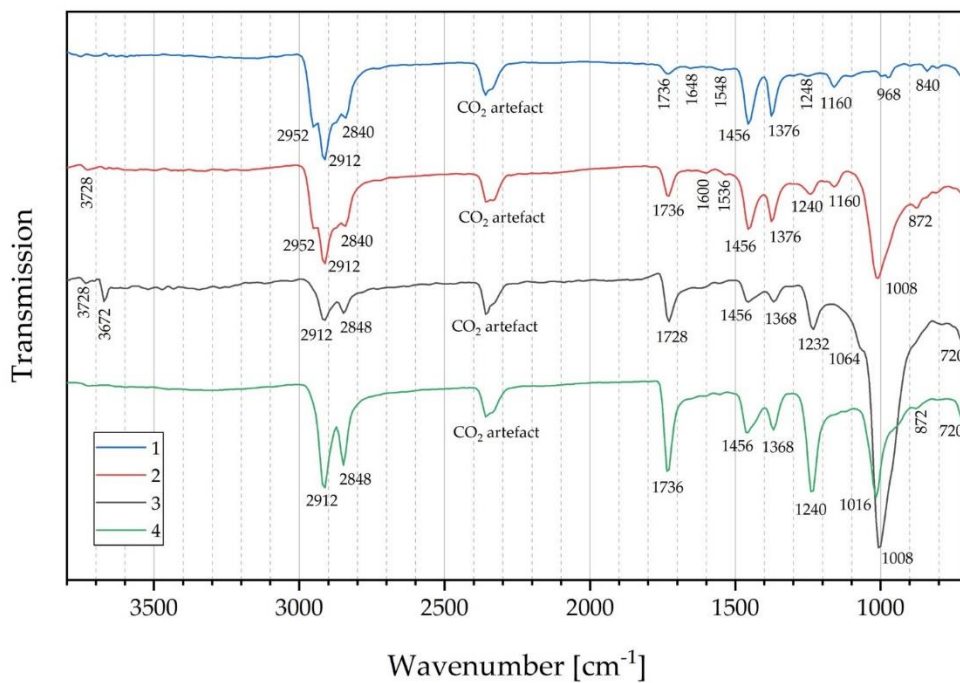

**Figure S20.** ATR-FTIR imaging of rPP-F sample 2. (a) ATR-FTIR image in false color representation recorded from a polished specimen cross-section exhibiting typical inclusions. (b) Summary spectra obtained from the regions 1 to 4 shown in (a) including wavenumber assignments of relevant bands.
