# Supplementary material for: Characterization of Composition and Structure–Property Relationships of Commercial Post-Consumer Polyethylene and Polypropylene Recyclates
Source: Polymers (Basel). 2021 May 14;13(10):1574. doi: 10.3390/polym13101574 (PMC8156794; doi:10.3390/polym13101574)
Supplement: Supplementary file 1 [file polymers-13-01574-s001.zip]

Archive with 21 entries (21 files):
- S1 rPE-A sample 1.jpg
- S10 rPE-E2 sample 2.jpg
- S11 rPE-F sample 1.jpg
- S12 rPE-F sample 2.jpg
- S13 rPP-A sample 1.jpg
- S14 rPP-A sample 2.jpg
- S15 rPP-C sample 1.jpg
- S16 rPP-C sample 2.jpg
- S17 rPP-D sample 1.jpg
- S18 rPP-D sample 2.jpg
- S19 rPP-F sample 1.jpg
- S2 rPE-A sample 2.jpg
- S20 rPP-F sample 2.jpg
- S3 rPE-C sample 1.jpg
- S4 rPE-C sample 2.jpg
- S5 rPE-D sample 1.jpg
- S6 rPE-D sample 2.jpg
- S7 rPE-E1 sample 1.jpg
- S8 rPE-E1 sample 2.jpg
- S9 rPE-E2 sample 1.jpg
- Supplementary Materials.pdf
